# Supplementary material for: Small Molecule Modulation of the Integrated Stress Response Governs the Keratoconic Phenotype In Vitro
Source: PubMed Central journal article supplement — Invest Ophthalmol Vis Sci. 2019 Aug;60(10):3422–31. doi: 10.1167/iovs.19-27151 (PMC6686743; doi:10.1167/iovs.19-27151), 2019-08
Supplement: iovs-60-08-44_s01.pdf [file iovs-60-08-44_s01.pdf]

Supplemental information 1 – Split Channels from Figure 1

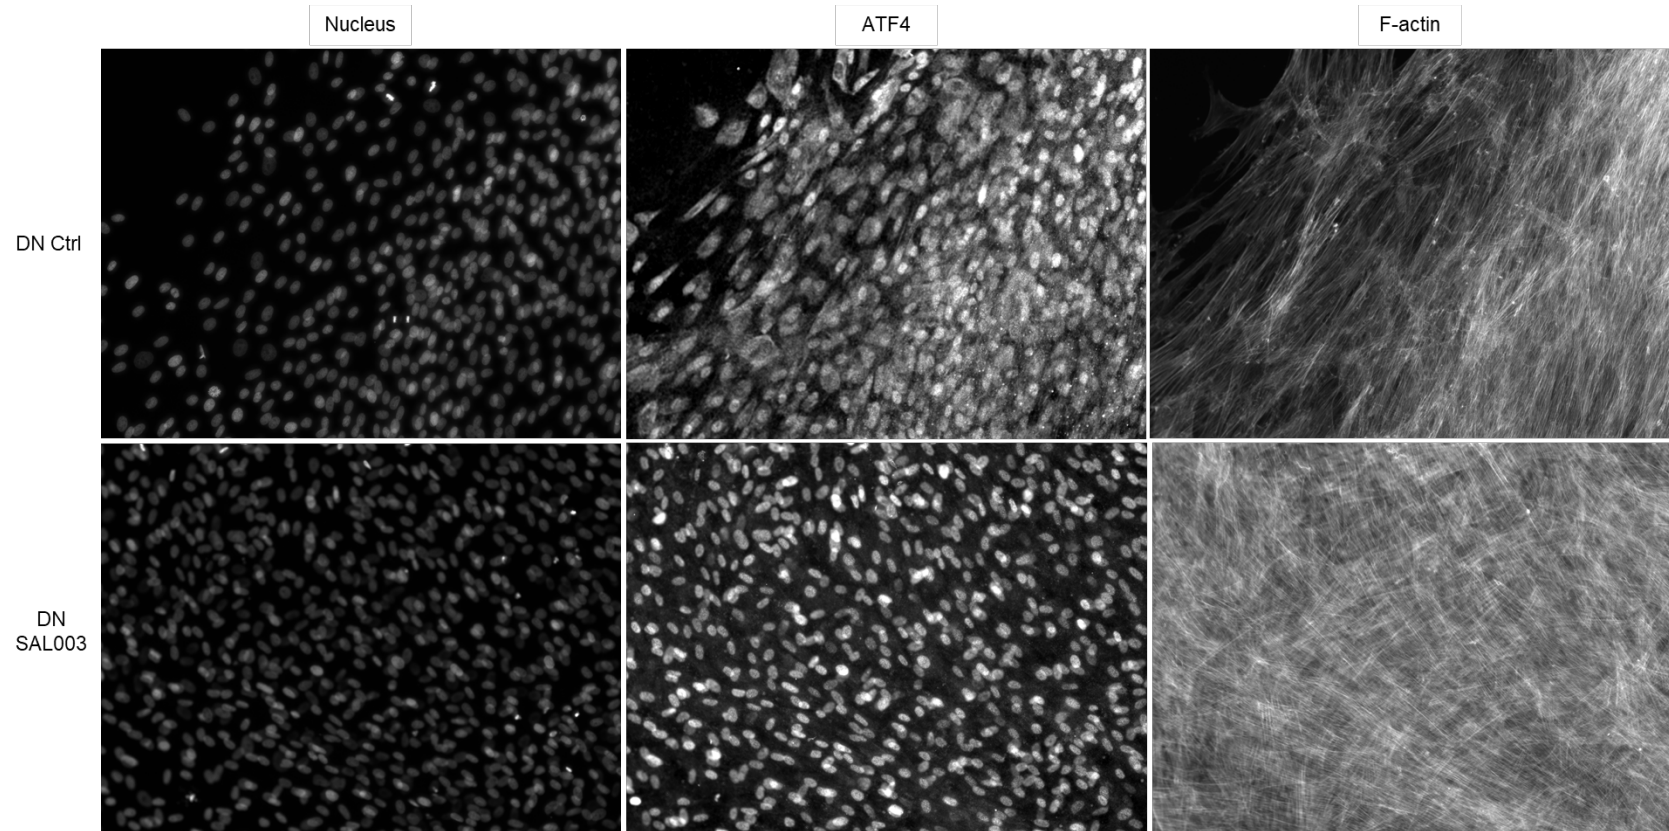

Nucleus

ATF4

F-actin

KC ctrl

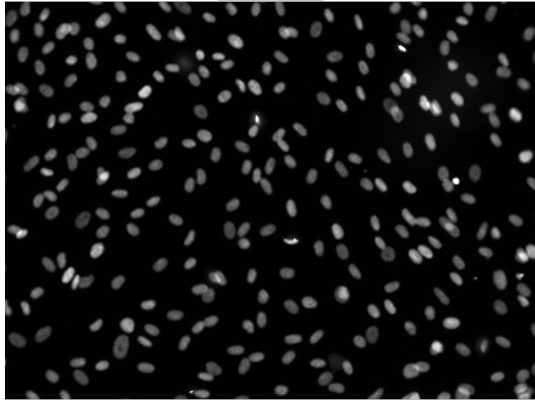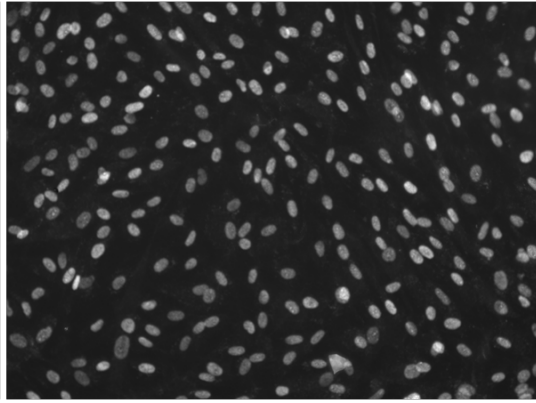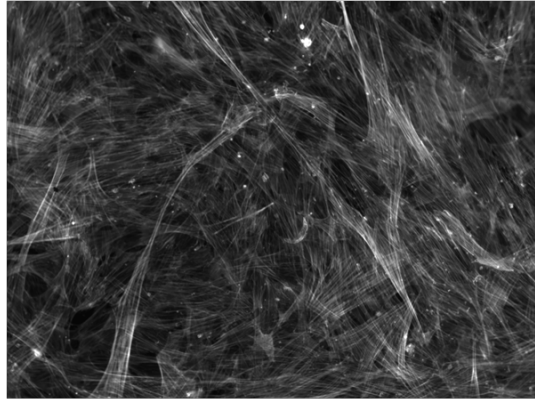

No  
primary  
control

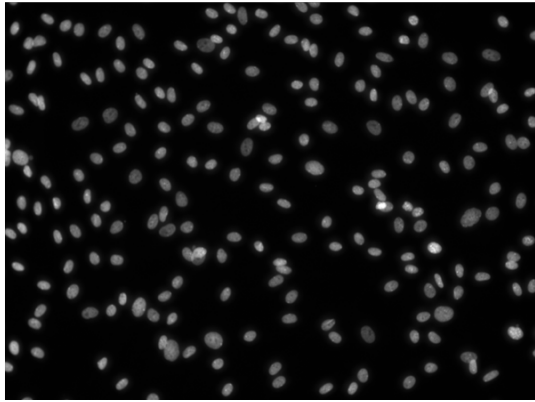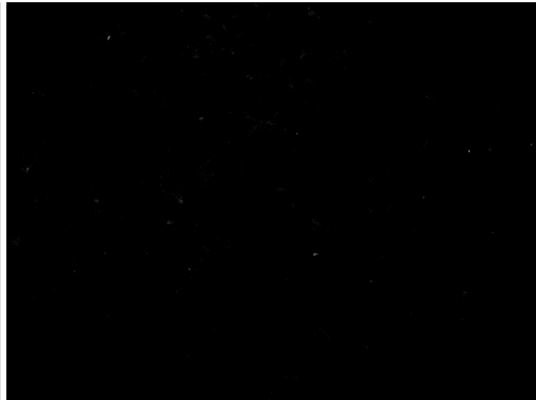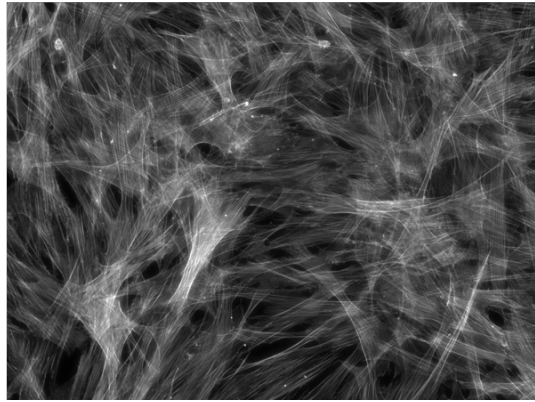

Supplemental Figure 2, Zymography gels from Figure 3, C

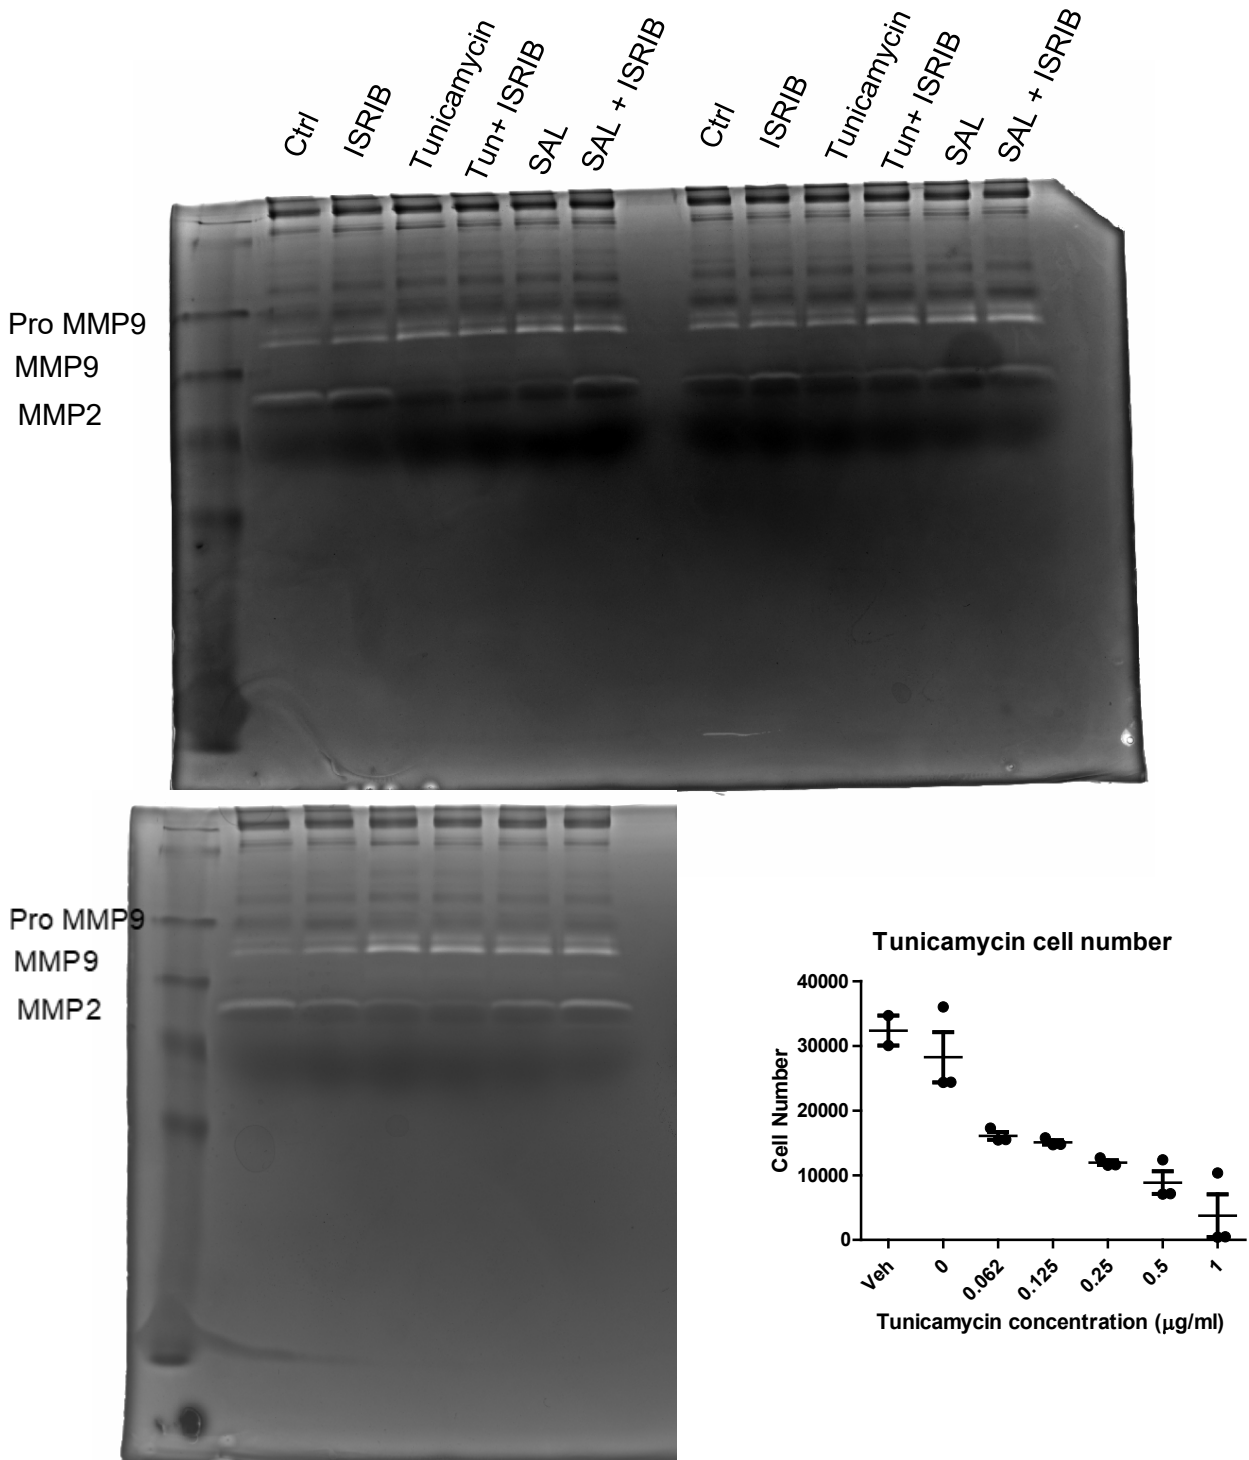

Full size zymograms as used in Fig 3. Lanes are DN cell lines treated with ISR stimulators tunicamycin (0.1µg/ml), SAL003 (2.5µM), or ISRIB (12.5nM). Tunicamycin toxicity curve after 3 days shows profound toxicity at concentrations below 60ng/ml.

Supplemental Figure 3. MMP3 and MMP13 qPCR results.

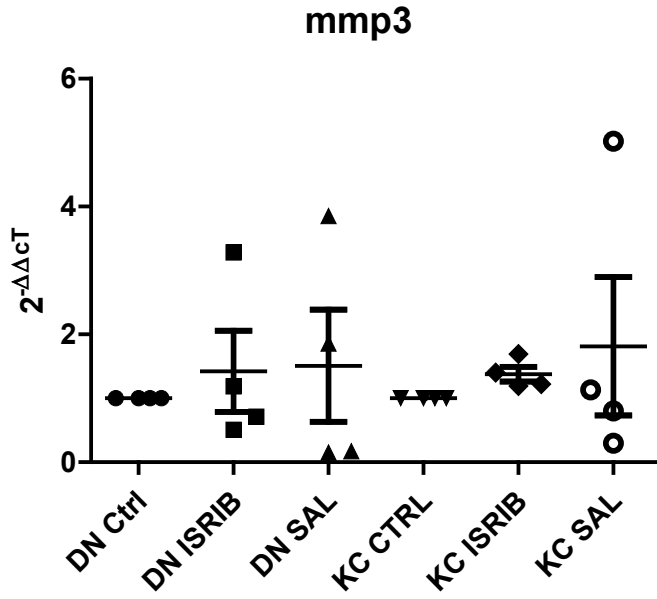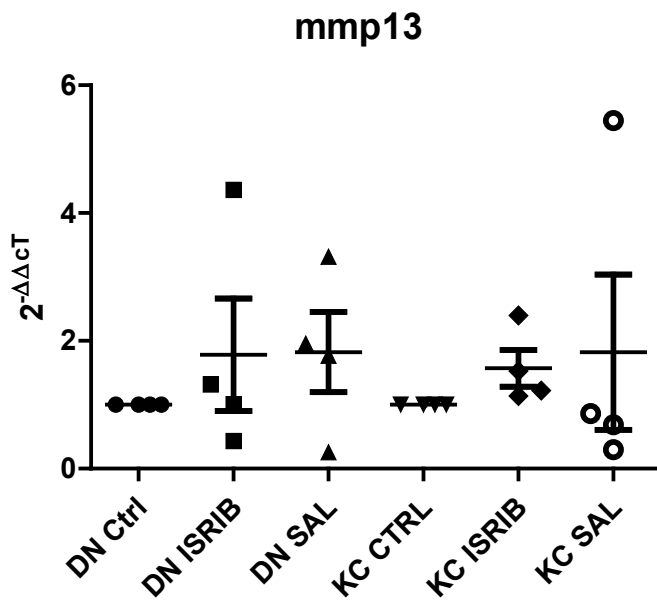

Both MMP3 and MMP13 showed no transcriptional response when treated with SAL or ISRIB.

Supplemental Figure 4. Total MMP quantification with no activation and 3 hours of APMA activation

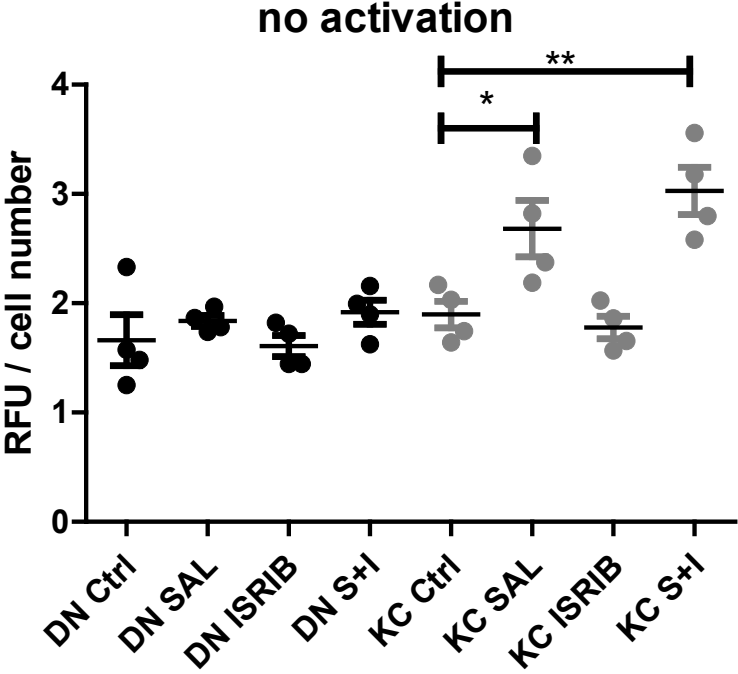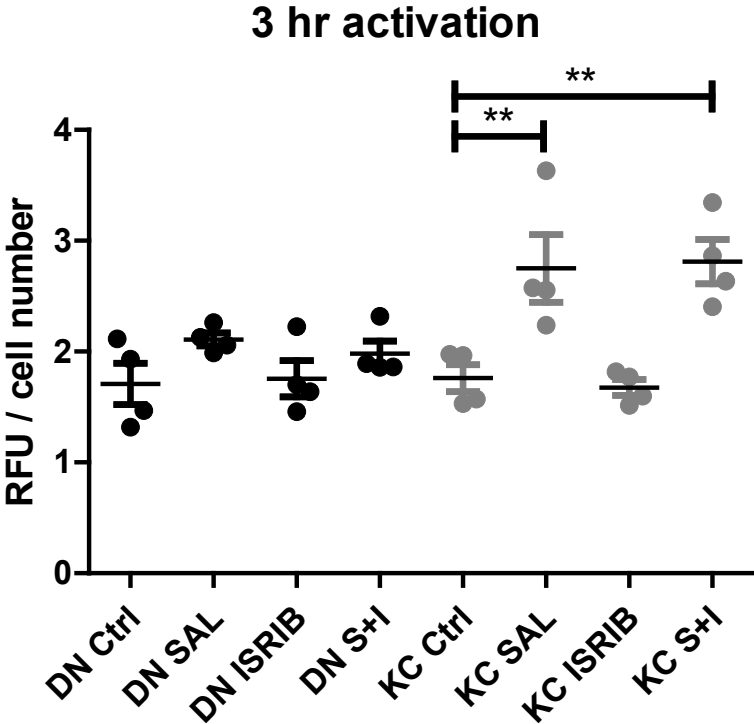

Supplemental Figure 5, TNF $\alpha$  ELISA results.

Human TNF-alpha Quantikine ELISA Kit, DTA00D, R&D systems

Undiluted media from 3 days cultures was loaded and samples run in duplicate.

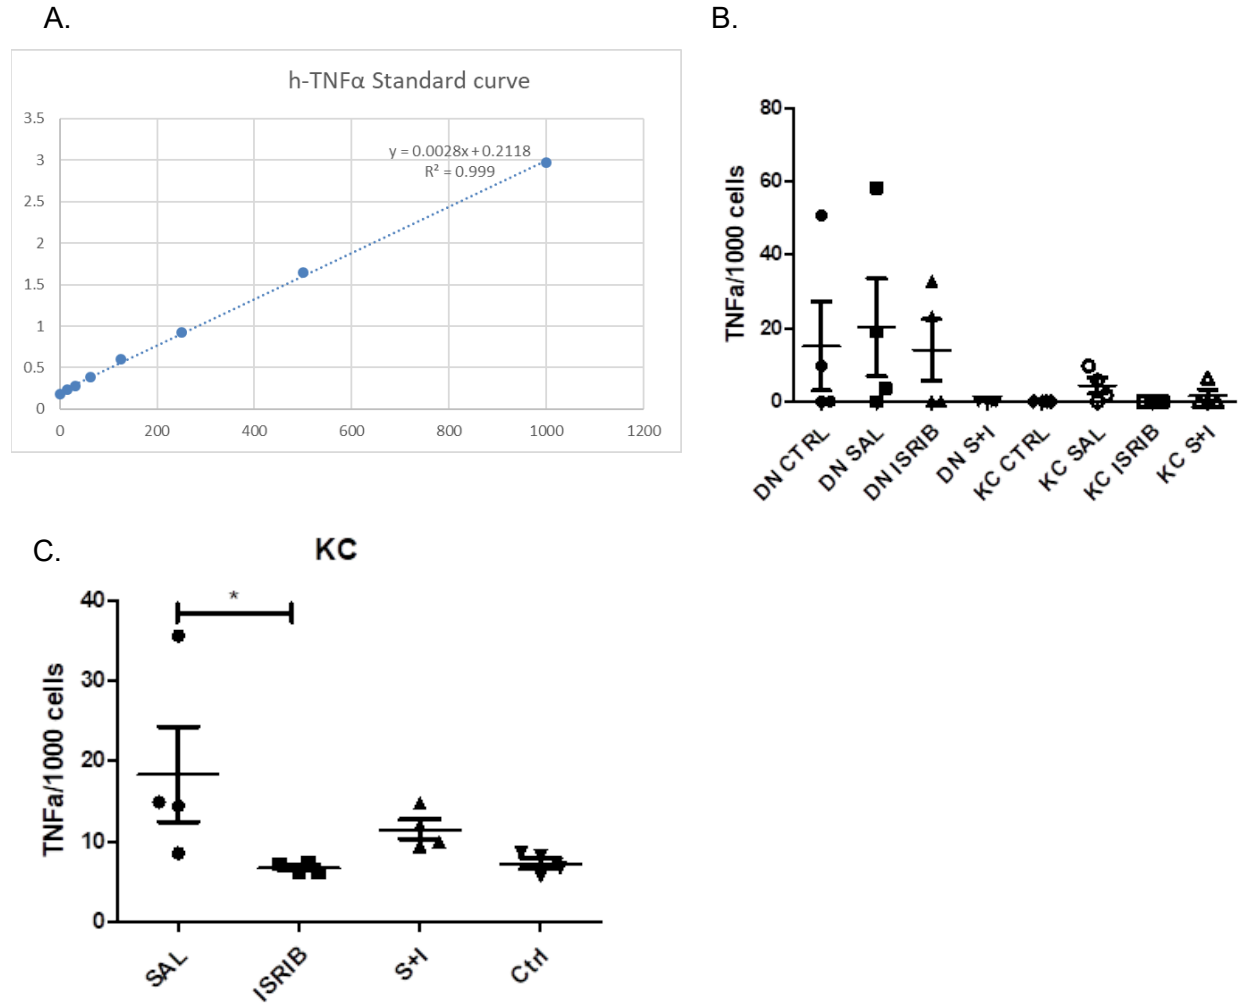

A. Standard curve from hTNF $\alpha$  ELISA.

B. TNF $\alpha$  expression in response to ISR stimulation, normalized to cell number (as determined by Alamar Blue). Expression is highly variable in the DN samples though overall expression is low. Expression below detectable limits (<6 pg/ml) is shown as 0.

C. Expression of TNF $\alpha$  in KC cells was less variable, though still low. SAL treatment increased expression relative to ISRIB only.
